# Supplementary material for: High-efficiency production of the antimicrobial peptide pediocin PA-1 in metabolically engineered Corynebacterium glutamicum using a microaerobic process at acidic pH and elevated levels of bivalent calcium ions
Source: PubMed Central journal article supplement (PMC9969654; doi:10.1186/s12934-023-02044-y), 2023-02-27
Supplement: 12934_2023_2044_MOESM1_ESM.pdf [file 12934_2023_2044_MOESM1_ESM.pdf]

**Supplementary File to**

**High-efficiency production of the antimicrobial peptide pediocin PA-1 in metabolically engineered *Corynebacterium glutamicum* using a microaerobic process at acidic pH and elevated levels of bivalent calcium ions**

Submitted for publication to Microbial Cell Factories

Jens Christmann<sup>a</sup>, Peng Cao<sup>a</sup>, Judith Becker<sup>a</sup>, Christian K. Desiderato<sup>b</sup>, Oliver Goldbeck<sup>b</sup>,  
Christian U. Riedel<sup>b</sup>, Michael Kohlstedt<sup>a</sup>, and Christoph Wittmann<sup>a\*</sup>

<sup>a</sup> Institute for Systems Biotechnology, Saarland University, Saarbrücken, Germany

<sup>b</sup> Institute of Microbiology and Biotechnology, University of Ulm, Ulm, Germany

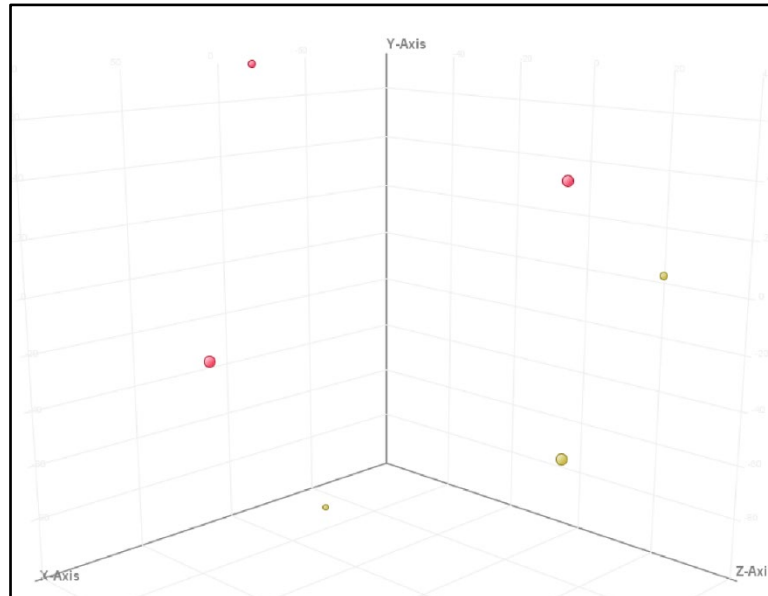

**Figure S1:** Principal component analysis of the transcriptome data set comprising the pediocin producer *C. glutamicum* CR099 pXMJ19  $P_{tac}$  pedACD and its reference *C. glutamicum* CR09 pXMJ19, expressing the empty plasmid. n=3.

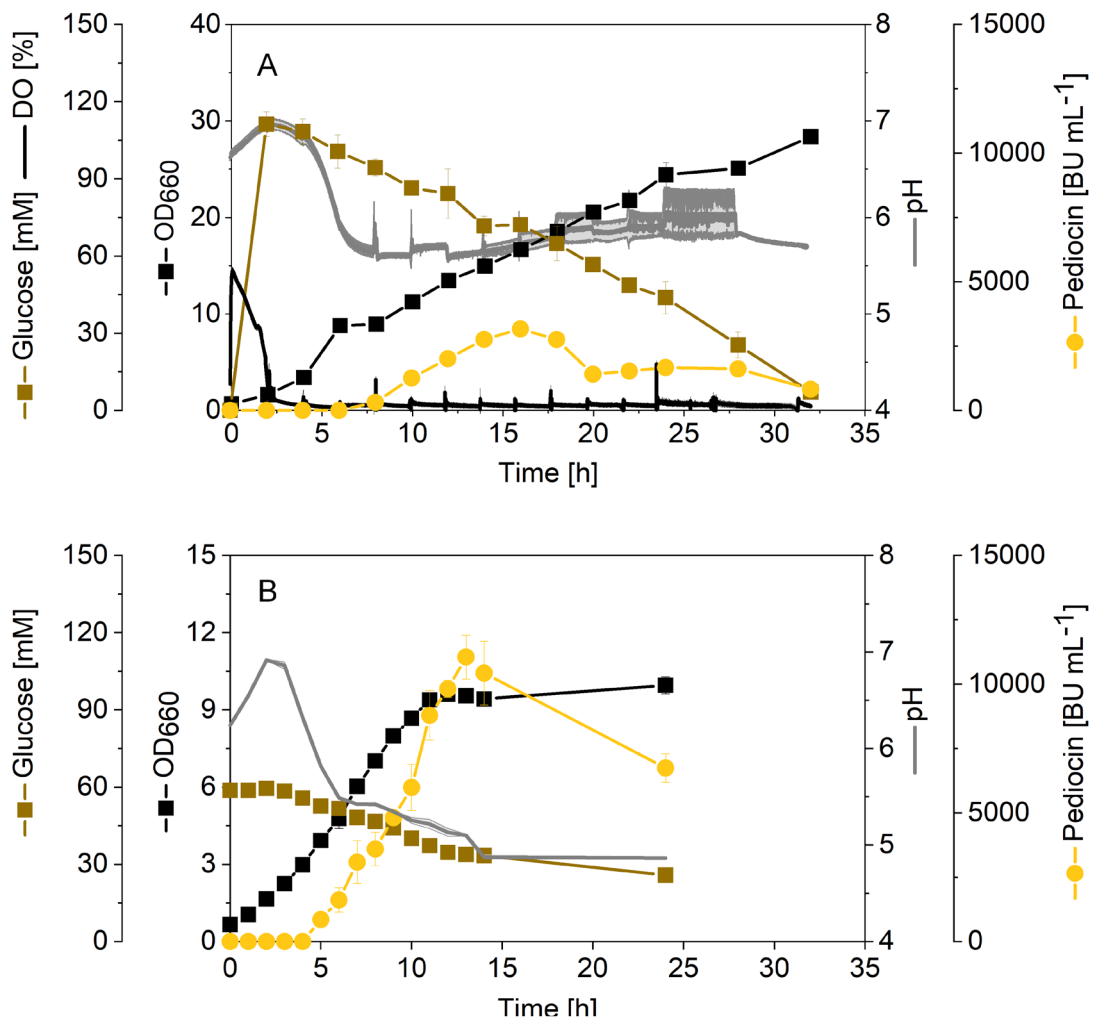

**Figure S2:** Pediocin production in recombinant *C. glutamicum* CR099 *pXMJ19 P<sub>tac</sub> pedACD<sup>Cg</sup>* using TY medium (A). Glucose (20 g L<sup>-1</sup>) was added after 2 h. Pediocin production was induced, also after 2 h, by the addition of 0.2 mM IPTG. During the process, pH value and DO were monitored online. GY medium based pediocin production with additional pH monitoring (B). n=3.

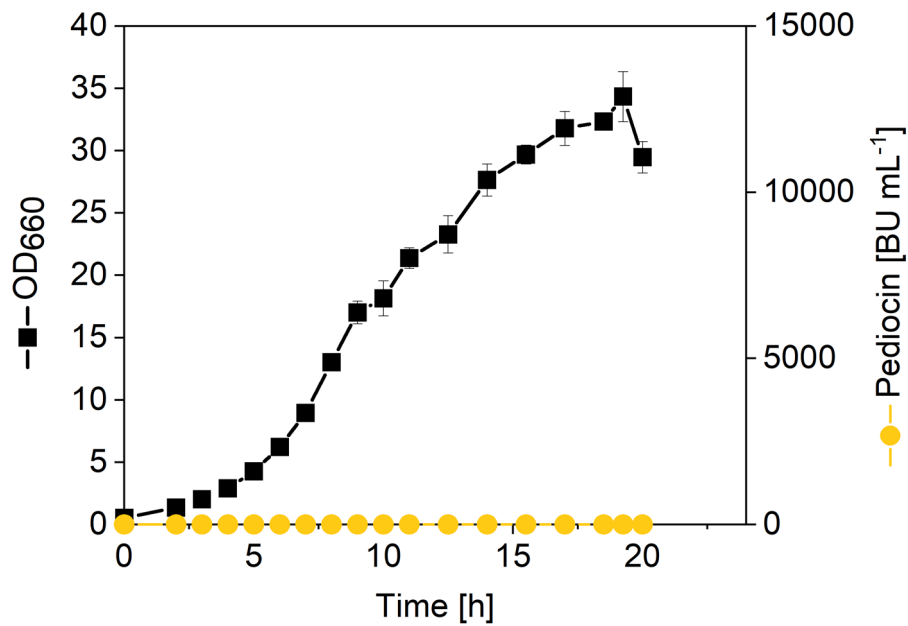

**Figure S3:** Pediocin production in recombinant *C. glutamicum* CR099  $pEKEx2 P_{tac} pedAM31LCD^{Cg}$  using TY medium in baffled shake flasks (aerobic conditions). Glucose ( $20 \text{ g L}^{-1}$ ) was added after 2 h. Pediocin production was induced, also after 2 h, by the addition of 0.2 mM IPTG. The used plasmid is a well-established vector for *C. glutamicum* [1]. n=3.

**Table S1:** Primers for strain construction.

| <b>Primer</b> | <b>Sequence</b>                                                         | <b>Annealing<br/>T [C°]</b> |
|---------------|-------------------------------------------------------------------------|-----------------------------|
| Primer 1      | GAAGTCCAGGAGGACATACAATGAAGAAGATTGAG<br>AAGCTGACCGA                      | 59                          |
| Primer 2      | CGCTTCCTTTAGCAGCCCGCTAGCGGATCATTTAAA<br>TCCCTTATTCCTGGTTATGAATGAGGCGTGC | 59                          |
| Primer 3      | GCTCTTCTGCGTTAATTAACAATTGGGATCCTCTAG<br>ACCCTGGCCGTTACCCTGCGAA          | 59                          |
| Primer 4      | AGCTTCTCAATCTTCTTCATTGTATGTCCTCCTGGAC<br>TTCGT                          | 59                          |

## Literature

1. Bakkes PJ, Ramp P, Bida A, Dohmen-Olma D, Bott M, Freudl R: **Improved pEKEx2-derived expression vectors for tightly controlled production of recombinant proteins in *Corynebacterium glutamicum***. *Plasmid* 2020, **112**:102540.
